# Supplementary material for: GLUT1 and GLUT3 involvement in anthocyanin gastric transport- Nanobased targeted approach
Source: PubMed Central journal article supplement (PMC6349854; doi:10.1038/s41598-018-37283-2), 2019-01-28
Supplement: 41598_2018_37283_MOESM1_ESM.pdf [file 41598_2018_37283_MOESM1_ESM.pdf]

## Supplementary Information

### **GLUT1 and GLUT3 involvement in anthocyanin gastric transport - Nanobased targeted approach.**

Hélder Oliveira<sup>1,¥</sup>, Catarina Roma-Rodrigues<sup>2,¥</sup>, Ana Santos<sup>2</sup>, Bruno Veigas<sup>2</sup>, Natércia Brás<sup>3</sup>, Ana Faria<sup>1,4,5,6</sup>, Conceição Calhau<sup>4,5,6</sup>, Victor de Freitas<sup>1</sup>, Pedro V. Baptista<sup>2,\*</sup>, Nuno Mateus<sup>1</sup>, Alexandra R. Fernandes<sup>2</sup>, Iva Fernandes<sup>1,\*</sup>

<sup>1</sup>REQUIMTE/LAQV, Department of Chemistry and Biochemistry, Faculty of Sciences, University of Porto, 4169-007 Porto; Portugal

<sup>2</sup>UCIBIO, Departamento de Ciências da Vida, Faculdade de Ciências e Tecnologia, Universidade Nova de Lisboa, Campus de Caparica, 2829-516 Caparica, Portugal;

<sup>3</sup>REQUIMTE/UCIBIO, Department of Chemistry and Biochemistry, Faculty of Sciences, University of Porto, 4169-007 Porto; Portugal

<sup>4</sup>Nutrition & Metabolism, NOVA Medical School|Faculdade Ciências Médicas Universidade Nova de Lisboa, 1169-056 Lisboa, Portugal

<sup>5</sup>CINTESIS, Center for Health Technology and Services Research, Porto, Portugal

<sup>6</sup>Comprehensive Health Research Centre, NOVA Medical School|Faculdade Ciências Médicas, Universidade Nova de Lisboa, 1169-056 Lisboa, Portugal

¥ both authors contributed equally

Corresponding author. Iva Fernandes and Pedro V Baptista, \*e-mail:

[iva.fernandes@fc.up.pt](mailto:iva.fernandes@fc.up.pt), telephone: +351.220402562 and [pmvb@fct.unl.pt](mailto:pmvb@fct.unl.pt), telephone: +351212948530.

## Figures

|                             | TEM (nm)                                                                          | SPR Peak | DLS size(nm) |
|-----------------------------|-----------------------------------------------------------------------------------|----------|--------------|
| AuNPs                       | $14 \pm 1$                                                                        | 520      | 19           |
| AuNP@PEG                    | 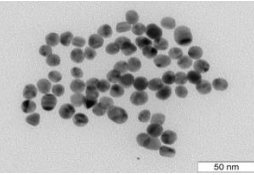 | 521      | 21.5         |
| AuNP@PEG@anti- <i>GLUT1</i> |                                                                                   | 524      | 31           |
| AuNP@PEG@anti- <i>GLUT3</i> |                                                                                   | 524      | 31           |

**Figure S1** – Characterization of gold nanoconjugates. Gold nanoparticles (AuNPs), AuNPs functionalized with 30 % PEG (AuNP@PEG) and AuNP@PEG functionalized with anti-GLUT1 (AuNP@PEG@anti-GLUT1) or anti-GLUT3 (AuNP@PEG@anti-GLUT3) through Transmission Electron Microscopy (TEM), Dynamic Light Scattering (DLS) and UV-Vis (Surface Plasmon Resonance, SPR peak).

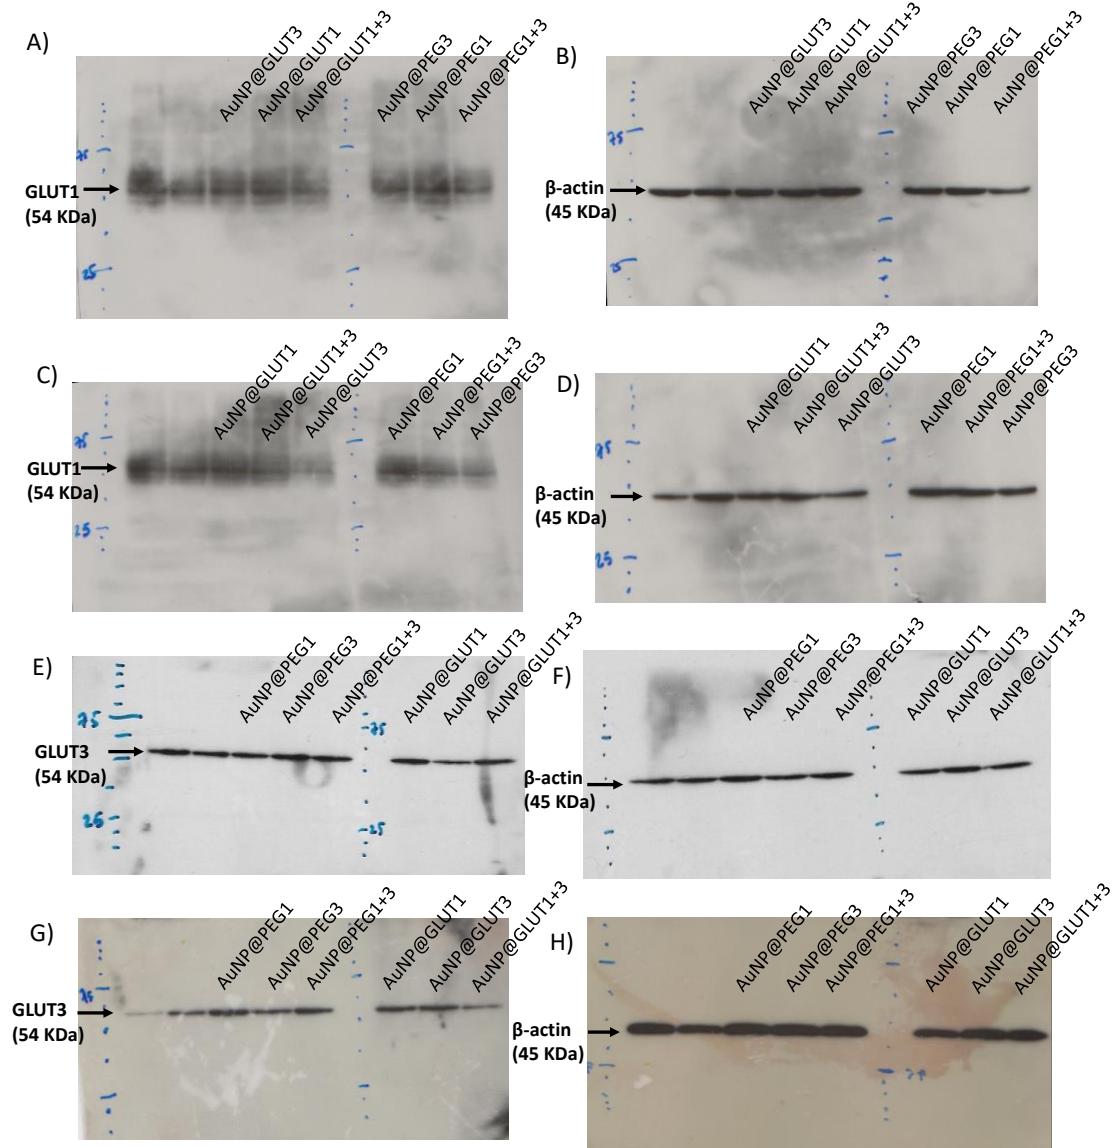

**Figure S2** – Full length blots of the Western Blot analysis of A) GLUT1 after 24 h; B) β-actin, control of GLUT1 blot after 24 h; C) GLUT1 after 24h+24h and D) β-actin, control of GLUT1 blot after 24h+24h. E) GLUT3 after 24 h; B) β-actin, control of GLUT3 blot after 24 h; C) GLUT3 after 24h+24h and D) β-actin, control of GLUT3 blot after 24h+24h. Represented Western Blots correspond to 10 μg total protein of MKN-28 cells incubated for 24 h or 24 h plus 24 h with fresh RPMI medium supplemented with 5.5 mM fructose and 30 nM AuNP@PEG@anti-*GLUT1* (AuNP@GLUT1), 20 nM AuNP@PEG@anti-*GLUT3* (AuNP@GLUT3), or a mixture of 30 nM AuNP@PEG@anti-*GLUT1* and 20 nM AuNP@PEG@anti-*GLUT3* (AuNP@GLUT1+3). After 24 h cells were collected or incubated for an additional 24 h with fresh medium supplemented according to the first incubation. Control samples consist in MKN-28 cells treated with RPMI medium supplemented with 5.5 mM

fructose and 0.75 nM AuNP@PEG (control of AuNP@GLUT1), 0.63 nM AuNP@PEG (control of AuNP@GLUT3), or 1.38 nM AuNP@PEG (control of AuNP@GLUT1+3), and collected at the same time point.

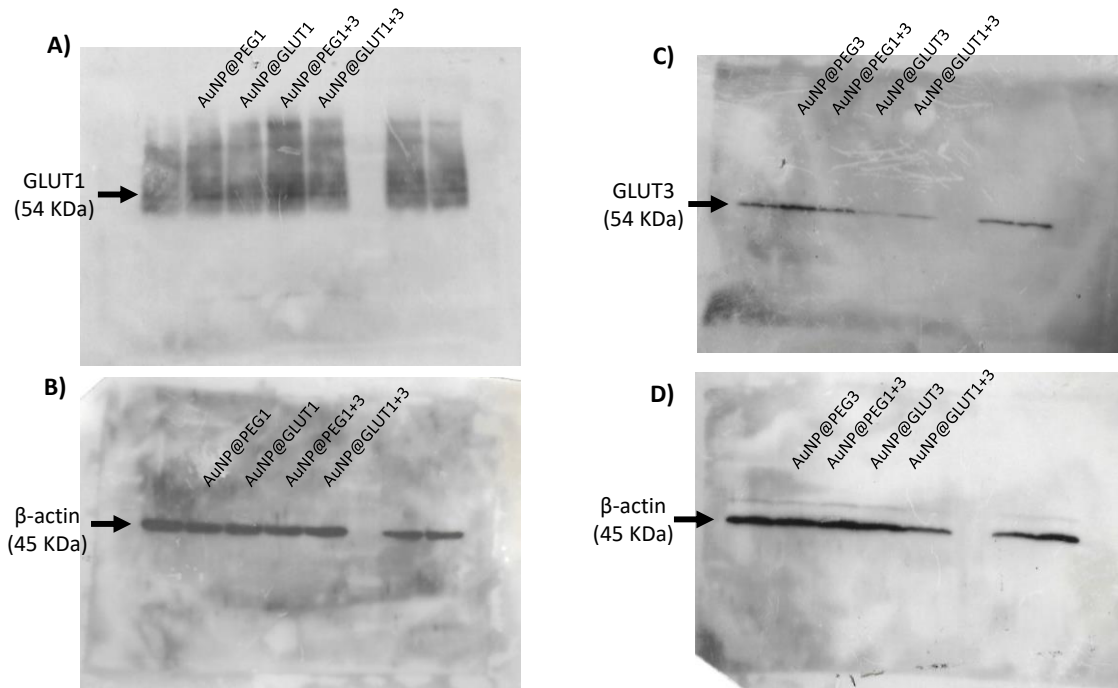

**Figure S3** – Full length blots of the Western Blot analysis of A) GLUT1; B)  $\beta$ -actin, control of GLUT1 blot; C) GLUT3 and D)  $\beta$ -actin, control of GLUT3 blot. Represented Western Blots correspond to 10  $\mu$ g total protein of MKN-28 cells grown on transwell plates and incubated for 24 h with fresh RPMI medium supplemented with 5.5 mM fructose and 0.75 nM AuNP@PEG (AuNP@PEG1), 0.63 nM AuNP@PEG (AuNP@PEG3), 1.38 nM AuNP@PEG (AuNP@PEG1+3), 30 nM AuNP@PEG@anti-GLUT1 (AuNP@GLUT1), 20 nM AuNP@PEG@anti-GLUT3 (AuNP@GLUT3), or a mixture of 30 nM AuNP@PEG@anti-GLUT1 and 20 nM AuNP@PEG@anti-GLUT3 (AuNP@GLUT1+3). After 24 h cells incubated for an additional 24 h with fresh medium supplemented according to the first incubation.
